# Supplementary material
Source: publisher figshare collection journal article supplement (https://acs.figshare.com/ndownloader/files/3820027)
Supplement: Supplementary file 1 [file 3820027]

**Physicochemical Interactions between Rhamnolipids and  
*Pseudomonas aeruginosa* Biofilm Layers**

Lan Hee Kim,<sup>†</sup> Yongmoon Jung,<sup>†</sup> Hye-Weon Yu,<sup>‡</sup> Kyu-Jung Chae,<sup>§</sup> and In S. Kim<sup>\*,†,⊥</sup>

<sup>†</sup> School of Environmental Science & Engineering, Gwangju Institute of Science and Technology  
(GIST), 123 Cheomdangwagi-ro, Buk-gu, Gwangju, 500-712, Republic of Korea

<sup>‡</sup> Department of Soil, Water and Environmental Science, Department of Chemical and Environmental  
Engineering, University of Arizona, Tucson, AZ85721, United States

<sup>§</sup> Department of Environmental Engineering, Korea Maritime and Ocean University, 727 Taejong-ro,  
Yeongdo-Gu, Busan 606-791, Republic of Korea

<sup>⊥</sup> Global Desalination Research Center (GDRC), Gwangju Institute of Science and Technology  
(GIST), 123 Cheomdangwagi-ro, Buk-gu, Gwangju 500-712, Republic of Korea

\*Corresponding author (E-mail: iskim@gist.ac.kr, Tel: +82-62-715-2436, Fax: +82-62-715-2434)

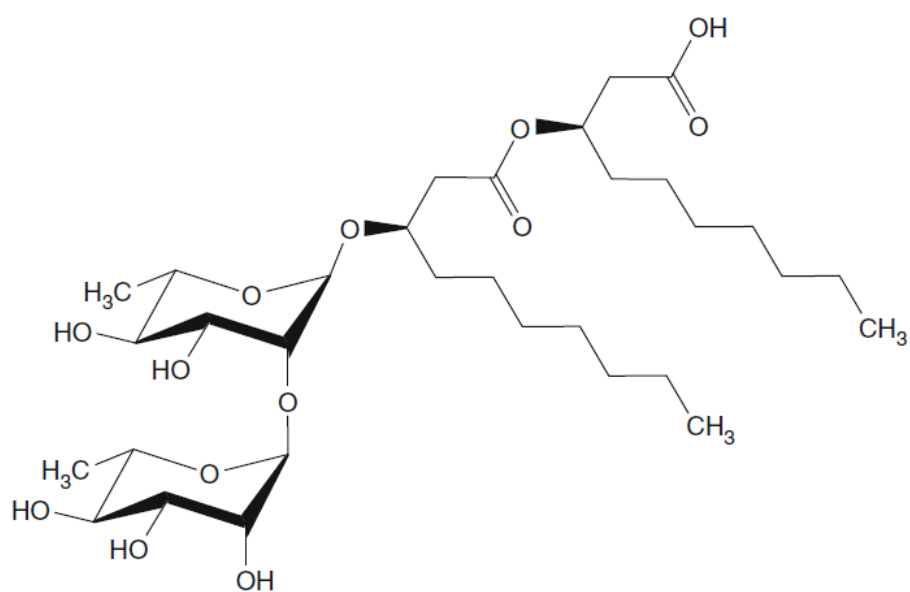

Figure S1. The chemical structure of di-rhamnolipid (Rha-Rha-C<sub>10</sub>-C<sub>10</sub>)<sup>1</sup>

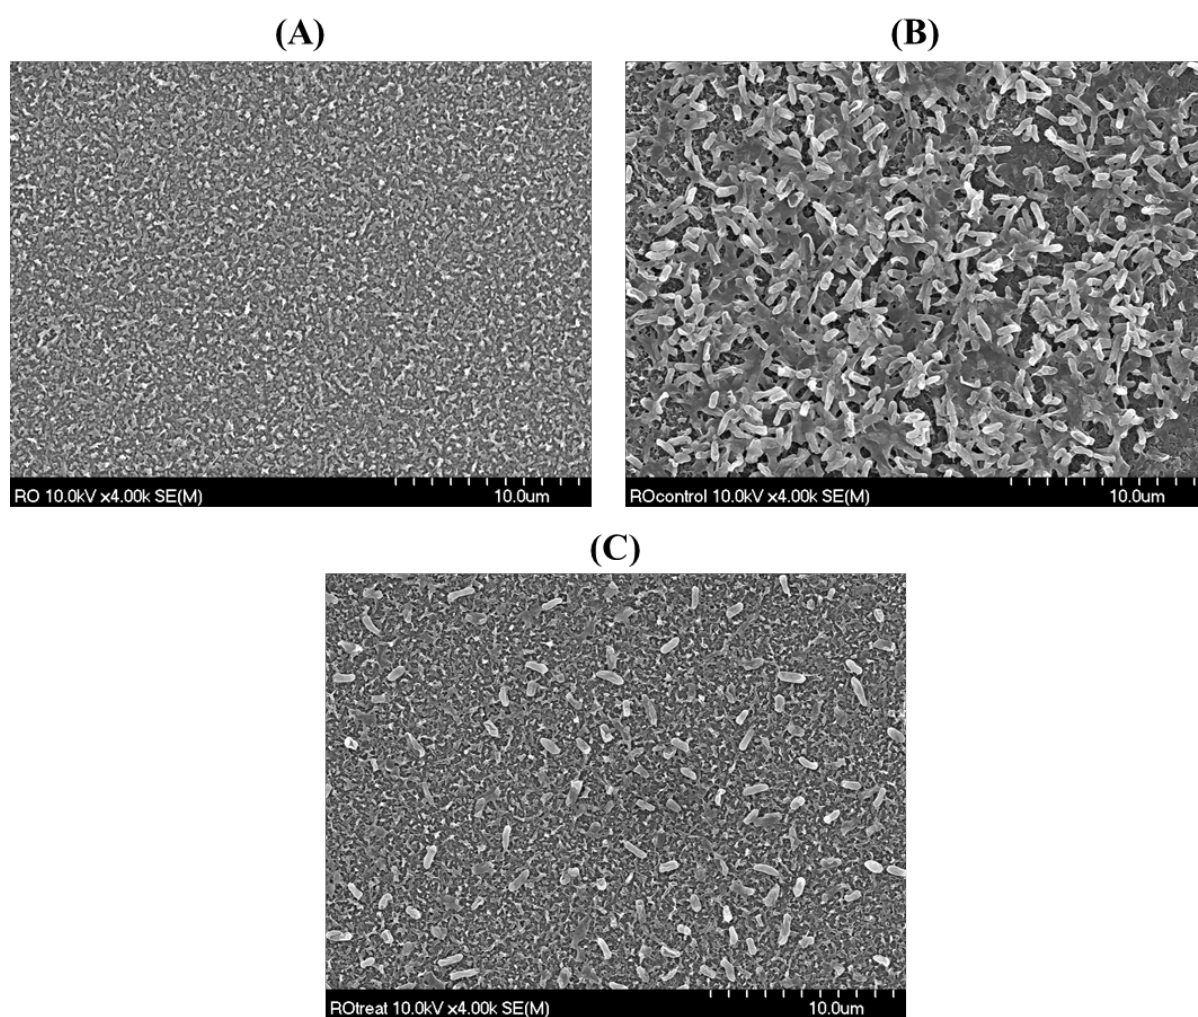

Figure S2. SEM images of (A) virgin RO membrane (B) biofouled RO membrane (C) rhamnolipid treated biofouled membrane. 100  $\mu\text{g mL}^{-1}$  of rhamnolipid was treated for 2 h in biofouled membrane ( $\times 4000$ ).

**SI-1. Calculation of micelle aggregation number ( $N_{agg}$ )**

The  $N_{agg}$  of rhamnolipid was estimated as following the reference equations.<sup>2</sup> If quenchers are distributed among micelles according to the Poisson-Boltzmann equation, then the probability of finding  $n$  quenchers associated with a given micelle is

$$P_n = \frac{[Q]^n}{n!} e^{-[Q]}$$

Where  $[Q]$  is the average number of quenchers in the micelles and  $[M]$  is the concentration of the micelles.

$$[Q] = [Q]/[M]$$

When we assume that fluorescence can be observed only for probes residing in micelles containing no quenchers at all, we write  $I = P_0 I_0$ , where  $I_0$  is the intensity in the absence of quencher. It follows that

$$I/I_0 = e^{-[Q]}$$

Therefore, by plotting  $\ln(I/I_0)$  vs  $[Q]$ , a straight line with a slope of  $[M]^{-1}$  should be observed.

The mean aggregation number  $N$  can now be calculated, since  $[M] = (C_D - CMC)/N$ , in which  $C_D$  is the total surfactant concentration

## REFERENCES

- (1) Abdel-Mawgoud, A. M.; Hausmann, R.; Le'pine, F.; Muller, M. M.; Déziel, E. Rhamnolipids: Detection, analysis, biosynthesis, genetic regulation, and bioengineering of production. In *Biosurfactants*; Soberon-Chavez, G., Eds.; Springer-Verlag; Berlin Heidelberg 2011; pp13-56.
- (2) Kevelam, J.; Engberts, J. B. F. N. Aggregation numbers of hydrophobic microdomains formed from poly(dimethyldiallylammonium-co-methyl-n-dodecyldiallylammonium) salts in aqueous solutions. *J. Colloid. Interface Sci.* **1996**, *178*, 87-92.
